# Supplementary material for: Deciphering the microRNA transcriptome of skeletal muscle during porcine development
Source: PeerJ. 2016 Jan 7;4:e1504. doi: 10.7717/peerj.1504 (PMC4715453; doi:10.7717/peerj.1504)
Supplement: Table S3 [file peerj-04-1504-s007.xlsx]

## Sheet: Sheet1
Table S3 Conserved miRNA group identified in this study.
ID	Pre-miRNA name	Pre-miRNA sequence	Length (nt)	Conserved pre-miRNAs	Genomic location of pre-miRNA based on Sscrofa10 genome assembly				new miR name	consensus sequence	Length(nt)	E90d			0d			30d			180d-1			180d-2			180d-3			7y-1			7y-2			7y-3
												Counts of high-quality reads:5042191			Counts of high-quality reads:4469677			Counts of high-quality reads:3476614			Counts of high-quality reads:12259667			Counts of high-quality reads:10435597			Counts of high-quality reads:9024703			Counts of high-quality reads:6239845			Counts of high-quality reads:3720989			Counts of high-quality reads:9389375
					Chromosome	Strand	Start	End				Most abundant sequences	Length(nt)	#copy of the miRNA	Most abundant sequences	Length(nt)	#copy of the miRNA	Most abundant sequences	Length(nt)	#copy of the miRNA	Most abundant sequences	Length(nt)	#copy of the miRNA	Most abundant sequences	Length(nt)	#copy of the miRNA	Most abundant sequences	Length(nt)	#copy of the miRNA	Most abundant sequences	Length(nt)	#copy of the miRNA	Most abundant sequences	Length(nt)	#copy of the miRNA	Most abundant sequences	Length(nt)	#copy of the miRNA
1	mir-377	ttcttgccctgctgacgtttgatccttgagcagaggttgcccttggtgaattcgctttatttacgttgaATCACACAAAGGCAACTTTTGtttgagtatcaaatcctgcctggga	115	bta-mir-377,oar-mir-377,ggo-mir-377,ptr-mir-377,cgr-mir-377,mmu-mir-377,rno-mir-377,	scaffold	-	10038	10152	miR-377-3p	ATCACACAAAGGCAACTTTTGT	22	ATCACACAAAGGCAACTTTTGT	22	914	ATCACACAAAGGCAACTTTTGT	22	369	ATCACACAAAGGCAACTTTTGT	22	1397	ATCACACAAAGGCAACTTTTGT	22	328	ATCACACAAAGGCAACTTTTG	21	169	ATCACACAAAGGCAACTTTTGT	22	82	ATCACACAAAGGCAACTTTTGT	22	22	ATCACACAAAGGCAACTTTTGT	22	12	ATCACACAAAGGCAACTTTTGT	22	75
2	mir-377	ttcttgccctgctgacgtttgatccttgagcAGAGGTTGCCCTTGGTGAATTCgctttatttacgttgaATCACACAAAGGCAACTTTTGTttgagtatcaaatcctgcctggga	115	bta-mir-377,oar-mir-377,ggo-mir-377,ptr-mir-377,cgr-mir-377,mmu-mir-377,rno-mir-377,	scaffold	-	10038	10152	miR-377-5p	AGAGGTTGCCCTTGGTGAATTC	22	AGAGGTTGCCCTTGGTGAATTC	22	526	AGAGGTTGCCCTTGGTGAATTC	22	308	AGAGGTTGCCCTTGGTGAATTC	22	15	AGAGGTTGCCCTTGGTGAATTC	22	6	AGAGGTTGCCCTTGGTGAATTC	22	5	AGAGGTTGCCCTTGGTGAATTC	22	10
3	mir-590	tagccaatcagaaatGAGCTTATTCATAAAAGTACagtataatccagtaaacctgTAATTTTATGTATAAGCTAGTctctgattgaaaaatgca	94	eca-mir-590,cfa-mir-590,hsa-mir-590,ptr-mir-590,ppy-mir-590,mmu-mir-590,	3	+	11024985	11025078	miR-590-3p	TAATTTTATGTATAAGCTAGT	21	TAATTTTATGTATAAGCTAGT	21	417	TAATTTTATGTATAAGCTAGT	21	552	TAATTTTATGTATAAGCTAGT	21	86	TAATTTTATGTATAAGCTAGT	21	158	TAATTTTATGTATAAGCTAGT	21	106	TAATTTTATGTATAAGCTAGT	21	101	TAATTTTATGTATAAGCTAGT	21	98	TAATTTTATGTATAAGCTAGT	21	31	TAATTTTATGTATAAGCTAGT	21	115
4	mir-590	tagccaatcagaaatGAGCTTATTCATAAAAGTACagtataatccagtaaacctgTAATTTTATGTATAAGCTAGTctctgattgaaaaatgca	94	eca-mir-590,cfa-mir-590,hsa-mir-590,ptr-mir-590,ppy-mir-590,mmu-mir-590,	3	+	11024985	11025078	miR-590-5p	GAGCTTATTCATAAAAGTACAG	22	GAGCTTATTCATAAAAGTACAG	22	11	GAGCTTATTCATAAAAGTACAG	22	33				GAGCTTATTCATAAAAGTACAG	22	4				GAGCTTATTCATAAAAGTACAG	22	5
5	mir-302b	actccctttaactttaacatgggagtgctttctgtgagttttaaagTAAGTGCTTCCATGTTTTAGTAGAagt	73	bta-mir-302b,eca-mir-302b,cfa-mir-302b,hsa-mir-302b,ptr-mir-302b,mmu-mir-302b,	8	+	115200071	115200143	miR-302b-3p	TAAGTGCTTCCATGTTTTAGT	21				TAAGTGCTTCCATGTTTTAGT	21	8				TAAGTGCTTCCATGTTTTAGT	21	6													TAAGTGCTTCCATGTTTTAGTAGT	24	3
6	mir-302a	cccaccACTTAAACGTGGATGTACTTGCTttcaaactctaaaagTAAGTGCTTCCATGTTTTAGTGatgg	70	bta-mir-302a,eca-mir-302a,cfa-mir-302a,hsa-mir-302a,ptr-mir-302a,mdo-mir-302a,	8	+	115200384	115200453	miR-302a-3p	TAAGTGCTTCCATGTTTTAGTG	22	TAAGTGCTTCCATGTTTTAGTG	22	3	TAAGTGCTTCCATGTTTTAGT	21	8				TAAGTGCTTCCATGTTTTAGT	21	6
7	mir-302a	cccaccACTTAAACGTGGATGTACTTGCTttcaaactctaaaagTAAGTGCTTCCATGTTTTAGTGatgg	70	bta-mir-302a,eca-mir-302a,cfa-mir-302a,hsa-mir-302a,ptr-mir-302a,mdo-mir-302a,	8	+	115200384	115200453	miR-302a-5p	ACTTAAACGTGGATGTACTTGCT	23				TAAACGTGGATGTACTTGCTTT	22	3				CTTAAACGTGGATGTACTTGCT	22	3
8	mir-367	ccatgactgttgctaatatgcaactctgttcaatacaaactggaATTGCACTTTAGCAATGGTGAtgg	68	bta-mir-367,eca-mir-367,cfa-mir-367,hsa-mir-367,ptr-mir-367,ppy-mir-367,mml-mir-367,mdo-mir-367,	8	+	115200685	115200752	miR-367-3p	ATTGCACTTTAGCAATGGTGA	21				ATTGCACTTTAGCAATGGTGA	21	3
9	mir-496	cagaagccagcaccctagttgggtacttgaatggaggttgtccatggtgtgttcattttatttatgatgAGTATTACATGGCCAATCTCCtttcagtaccaaattcttcttggg	114	bta-mir-496,oar-mir-496,eca-mir-496,cfa-mir-496,hsa-mir-496,ggo-mir-496,ptr-mir-496,ppy-mir-496,mml-mir-496,mmu-mir-496a,rno-mir-496,	scaffold	-	11718	11831	miR-496-3p	TGAGTATTACATGGCCAATCT	21	TGAGTATTACATGGCCAATCTC	22	154	TGAGTATTACATGGCCAATCT	21	56	AGTATTACATGGCCAATCTCC	21	3
10	mir-194	TGTAACAGCGACTCCATGTGGACtgtgccccaatttccagtggagatgctgttac	55	cfa-mir-194,	10	-	11786884	11786938	miR-194-5p	TGTAACAGCAACTCCATGTGGAT	23							TGTAACAGCAACTCCATGTGGAT	23	3
11	mir-154b	agagctacttggtggtacttgaagAGAGGTCTTCCATGGTGCATTCGctttattttttttgacgAATCATACATGGTTGACCTTTTTttaggtatcaaatctggcc	106	bta-mir-154b,oar-mir-154b,	scaffold	-	12244	12349	miR-154b-3p	AATCATACATGGTTGACCTTTTT	23	AATCATACATGGTTGACCTTTTT	23	123	AATCATACATGGTTGACCTTTTT	23	52	AATCATACATGGTTGACCTTTTT	23	3
12	mir-154b	agagctacttggtggtacttgaagAGAGGTCTTCCATGGTGCATTCGctttattttttttgacgAATCATACATGGTTGACCTTTTTttaggtatcaaatctggcc	106	bta-mir-154b,oar-mir-154b,	scaffold	-	12244	12349	miR-154b-5p	AGAGGTCTTCCATGGTGCATTCG	23	AGAGGTCTTCCATGGTGCATTCG	23	217	AGAGGTCTTCCATGGTGCATTCG	23	64	AGAGGTCTTCCATGGTGCATTCG	23	33	AGAGGTCTTCCATGGTGCATTCG	23	5	AGAGGTCTTCCATGGTGCATTCG	23	5
13	mir-488	aatttcagagaatcatctctCCCAGATAATGGCACTCTCAAAcaagtttccaagttgtTTGAAAGGCTATTTCTTGGTCAgaagactctcagtgccttctggaagcctca	110	bta-mir-488,eca-mir-488,cfa-mir-488,hsa-mir-488,ggo-mir-488,ptr-mir-488,ppy-mir-488,rno-mir-488,	9	-	130508320	130508429	miR-488-3p	TTGAAAGGCTATTTCTTGGTCT	22	TTGAAAGGCTATTTCTTGGTCT	22	3	TTGAAAGGCTATTTCTTGGTCT	22	3																			TTGAAAGGCTATTTCTTGGTCT	22	4
14	mir-665	tctccttgaggggccttagcctctgcccaggactctctcgtgACCAGGAGGCTGAGGCCCCTCAcaggcggc	72	hsa-mir-665,ptr-mir-665,	7	+	132092901	132092972	miR-665-3p	ACCAGGAGGCTGAGGCCCCTCACT	24	ACCAGGAGGCTGAGGCCCCTCACT	24	3	ACCAGGAGGCTGAGGCCCCTCA	22	7
15	mir-431	tcctgctcgtcctgcgaggTGTCTTGCAGGCCGTCATGCaggccacactgacggtaacgttgCAGGTCGTCTTGCAGGGCTTCTcgcaagacgacatcctcgtcgtcgacgacgtgcagctccaggcagaggttctggcgcgggc	145	bta-mir-431,oar-mir-431,eca-mir-431,hsa-mir-431,ggo-mir-431,ptr-mir-431,mmu-mir-431,rno-mir-431,	7	+	132097559	132097703	miR-431-3p	CAGGTCGTCTTGCAGGGCTTCT	22	CAGGTCGTCTTGCAGGGCTTCT	22	889	CAGGTCGTCTTGCAGGGCTTCT	22	140	CAGGTCGTCTTGCAGGGCTTCT	22	9	CAGGTCGTCTTGCAGGGCTTCT	22	3	CAGGTCGTCTTGCAGGGCTTCT	22	3
16	mir-431	tcctgctcgtcctgcgaggTGTCTTGCAGGCCGTCATGCaggccacactgacggtaacgttgcaggtcgtcttgcagggcttctcgcaagacgacatcctc	101	bta-mir-431,oar-mir-431,eca-mir-431,hsa-mir-431,ptr-mir-431,mmu-mir-431,rno-mir-431,	7	+	132097559	132097659	miR-431-5p	TGTCTTGCAGGCCGTCATGC	20	TGTCTTGCAGGCCGTCATGC	20	22826	TGTCTTGCAGGCCGTCATGC	20	17572	TGTCTTGCAGGCCGTCATGC	20	10451	TGTCTTGCAGGCCGTCATGC	20	8870	TGTCTTGCAGGCCGTCATGC	20	5723	TGTCTTGCAGGCCGTCATGC	20	5344	TGTCTTGCAGGCCGTCATGC	20	1122	TCCCTGAGACCCTAACTTGTGAA	23	687	TCCCTGAGACCCTAACTTGTGAA	23	1037
17	mir-375	gccaggccccgggccctccgcccccgccccgcgacgagcccctcgcacaaaccggacctgagcgtTTTGTTCGTTCGGCTCGCGTGAggcaggggcggcctctcagc	107	bta-mir-375,cfa-mir-375,ggo-mir-375,ptr-mir-375,rno-mir-375,mdo-mir-375,	15	+	133957529	133957635	miR-375-3p	TTTGTTCGTTCGGCTCGCGTGA	22	TTTGTTCGTTCGGCTCGCGTGA	22	8
18	mir-153-1	ctcacagctgccagcgtcatttttgtgatctgcagctagtattctcactccagTTGCATAGTCACAAAAGTGATCattggcaggtgtggc	90	bta-mir-153-1,eca-mir-153-2,eca-mir-153-1,cfa-mir-153,hsa-mir-153-1,mmu-mir-153,mdo-mir-153-1,	15	-	134369146	134369235	miR-153-1-3p	TTGCATAGTCACAAAAGTGATC	22	TTGCATAGTCACAAAAGTGATC	22	7	TTGCATAGTCACAAAAGTGATC	22	6				TTGCATAGTCACAAAAGTGATC	22	7	TTGCATAGTCACAAAAGTGATC	22	3	TTGCATAGTCACAAAAGTGATC	22	3
19	mir-760	ctcggaggatgctgcggcgcggggcgcgtcgcccccctcagtccaccagagcccggatgcctcagaaattCGGCTCTGGGTCTGTGGGGAgcgaaatgcaacccaaaccccatttt	116	bta-mir-760,hsa-mir-760,ggo-mir-760,ptr-mir-760,ppy-mir-760,mmu-mir-760,rno-mir-760,	4	-	135067624	135067739	miR-760-3p	CGGCTCTGGGTCTGTGGGGAGT	22	CGGCTCTGGGTCTGTGGGGAGT	22	4
20	mir-507	tgtgtgcggtgctccacttcaagaagtgccatccatgtggctagaaataTGATTGGCACCTCTTTGAGTGAcgtaacacacaacaggtac	90	eca-mir-507,	X	-	137160736	137160825	miR-507-3p	TGATTGGCACCTCTTGGAGTGA	22	TGATTGGCACCTCTTGGAGTGA	22	17	TGATTGGCACCTCTTGGAGTGA	22	4	TGATTGGCACCTCTTGGAGTGA	22	3
21	mir-509	catactgtgtgtgctacccTACTGCAGAGAGTGGCAATCatgtataattaaaaatgattgacacctctgttagtggagtaacatatgaca	90	eca-mir-509,	X	-	137225792	137225881	miR-509-5p	TACTGCAGAGAGTGGCAATC	20	TACTGCAGAGAGTGGCAATCATG	23	6
22	mir-147	actctatgaatctagtggaaacacttctgcacaaactagattctggataccAGTGTGCGGAAATGCTTCTGCTacatttttagggc	86	bta-mir-147,cfa-mir-147,hsa-mir-147b,ptr-mir-147b,cgr-mir-147,mmu-mir-147,rno-mir-147,	1	+	140918986	140919071	miR-147-3p	AGTGTGCGGAAATGCTTCTGCT	22	GTGTGCGGAAATGCTTCTGCT	21	4
23	mir-147	actctatgaatctagTGGAAACACTTCTGCACAAACTagattctggataccAGTGTGCGGAAATGCTTCTGCTacatttttagggc	86	bta-mir-147,cfa-mir-147,hsa-mir-147b,ptr-mir-147b,cgr-mir-147,mmu-mir-147,rno-mir-147,	1	+	140918986	140919071	miR-147-5p	TGGAAACACTTCTGCACAAACT	22	TGGAAACACTTCTGCACAAACT	22	4				TGGAAACACTTCTGCACAAACT	22	3
24	mir-6529	ctgttctcttGAGAGATCAGAGGCGCAGAGTgcgtcaatgtcagtgaagCCTGTGCCTTTTACCTCTTTAAgagcgcac	79	bta-mir-6529,	13	+	149441291	149441369	miR-6529-3p	CCTGTGCCTTTTACCTCTTTA	21	CCTGTGCCTTTTACCTCTTTAA	22	19	CCTGTGCCTTTTACCTCTTTA	21	11	CCTGTGCCTTTTACCTCTTTA	21	5	CCTGTGCCTTTTACCTCTTTAA	22	7	CCTGTGCCTTTTACCTCTTTA	21	3										CCTGTGCCTTTTACCTCTTTAAT	23
25	mir-6529	ctgttctcttGAGAGATCAGAGGCGCAGAGTgcgtcaatgtcagtgaagCCTGTGCCTTTTACCTCTTTAAgagcgcac	79	bta-mir-6529,	13	+	149441291	149441369	miR-6529-5p	GAGAGATCAGAGGCGCAGAGT	21	GAGAGATCAGAGGCGCAGAGT	21	1294	GAGAGATCAGAGGCGCAGAGT	21	779	GAGAGATCAGAGGCGCAGAGT	21	250	GAGAGATCAGAGGCGCAGAGT	21	1309	GAGAGATCAGAGGCGCAGAGT	21	598	GAGAGATCAGAGGCGCAGAGT	21	443	GAGAGATCAGAGGCGCAGAGT	21	221	GAGAGATCAGAGGCGCAGAGT	21	121	GAGAGATCAGAGGCGCAGAGT	21
26	mir-302d	cctctactttaacatggagccacttgctgtgaattgatgaaaaaaaaTAAGTGCTTCCATGTTTTAGTGcggtg	74	bta-mir-302d,eca-mir-302d,cfa-mir-302d,	scaffold	-	15522	15595	miR-302d-3p	TAAGTGCTTCCATGTTTTAGT	21	TAAGTGCTTCCATGTTTTAGTGT	23	3	TAAGTGCTTCCATGTTTTAGT	21	8				TAAGTGCTTCCATGTTTTAGT	21	6
27	mir-30f	tggcagcctgccgcTGTAAACATCCGACTGAAagctcctgggaacgcctcacagcttccagtcaaggatgtttacagtggcaaagactgccc	92	mmu-mir-30f,	6	+	157476651	157476742	miR-30f-5p	TGTAAACATCCGACTGGAAGCT	22				TGTAAACATCCGACTGGAAGCT	22	3				TGTAAACATCCGACTGGA	18	6	TGTAAACATCCGACTGGA	18	4										TGTAAACATCCGACTGGA	18	3
28	mir-3557	agcggcgaaggcgactccacgcaggccttctgactccaagtccagtgctatttccaggcaacacaCAGGACCTGGAGTCAGGAGCCCtgggtggctctgtcacccactggctg	113	rno-mir-3557,	2	-	157640334	157640446	miR-3557-3p	CAGGACCTGGAGTCAGGAGCCC	22																						CAGGACCTGGAGTCAGGAGCCC	22	3
29	mir-485	tatggtacttgaagAGAGGCTGGCCGTGATGAATTCGAttcatcaaagcgaGTCATACACGGCTCTCCTCTCTtttagtgtcagattctgcctcggagggctt	103	bta-mir-485,oar-mir-485,cfa-mir-485,hsa-mir-485,ggo-mir-485,ptr-mir-485,mmu-mir-485,rno-mir-485,	scaffold	-	16587	16689	miR-485-3p	GTCATACACGGCTCTCCTCTCT	22	GTCATACACGGCTCTCCTCTCT	22	4456	GTCATACACGGCTCTCCTCTCT	22	1095	GTCATACACGGCTCTCCTCTCT	22	98	GTCATACACGGCTCTCCTCTCT	22	18	GTCATACACGGCTCTCCTCTCT	22	8	GTCATACACGGCTCTCCTCTCT	22	14
30	mir-485	tatggtacttgaagAGAGGCTGGCCGTGATGAATTCGattcatcaaagcgagtcatacacggctctcctctcttttagtgtcagattctgcctcggagggctt	103	bta-mir-485,oar-mir-485,cfa-mir-485,hsa-mir-485,ggo-mir-485,ptr-mir-485,mmu-mir-485,rno-mir-485,	scaffold	-	16587	16689	miR-485-5p	AGAGGCTGGCCGTGATGAATTC	22							AGAGGCTGGCCGTGATGAATTCGT	24	3				AGAGGCTGGCCGTGATGAATTC	22	7							AGAGGCTGGCCGTGATGAATTCGT	24	3	AGAGGCTGGCCGTGATGAATTCGT	24	3
31	mir-330	tcgtgctgtgtgacctttggcgatcactgccTCTCTGGGCCTGTGTCTTAGGCTctgcaagatcaaccgagCAAAGCACACGGCCTGCAGAGAGGcagcgctccgctc	108	bta-mir-330,cfa-mir-330,hsa-mir-330,ggo-mir-330,ptr-mir-330,mmu-mir-330,rno-mir-330,	scaffold	-	17714	17821	miR-330-3p	CAAAGCACACGGCCTGCAGAGAGGT	25	GCAAAGCACACGGCCTGCAGAG	22	25	GCAAAGCACACGGCCTGCAGA	21	14	GCAAAGCACACGGCCTGCAGAG	22	18	CAAAGCACACGGCCTGCAGAGAGGT	25	7	CAAAGCACACGGCCTGCAGAGAGT	24	9	CAAAGCACACGGCCTGCAGAGA	22	5	CAAAGCACACGGCCTGCAGAGAGC	24	3				CAAAGCACACGGCCTGCAGAGAGGT	25	4
32	mir-330	tcgtgctgtgtgacctttggcgatcactgccTCTCTGGGCCTGTGTCTTAGGCTctgcaagatcaaccgagCAAAGCACACGGCCTGCAGAGAGGcagcgctccgctc	108	bta-mir-330,cfa-mir-330,hsa-mir-330,ggo-mir-330,ptr-mir-330,mmu-mir-330,rno-mir-330,	scaffold	-	17714	17821	miR-330-5p	TCTCTGGGCCTGTGTCTTAGGCT	23	TCTCTGGGCCTGTGTCTTAGGCT	23	22	TCTCTGGGCCTGTGTCTTAGGCT	23	11	TCTCTGGGCCTGTGTCTTAGGCT	23	24	TCTCTGGGCCTGTGTCTTAGGCT	23	76	TCTCTGGGCCTGTGTCTTAGGCT	23	73	TCTCTGGGCCTGTGTCTTAGGCT	23	36				TCTCTGGGCCTGTGTCTTAGGCT	23	4	TCTCTGGGCCTGTGTCTTAGGCT	23	5
33	mir-3591	cagtagctaTTTAGTGTGATAATGGCGTTTGatagtttggacacaaacaccattgtcacactccacagctctg	73	hsa-mir-3591,	1	+	179916342	179916414	miR-3591-5p	TTTAGTGTGATAATGGCGTTTG	22	TTTAGTGTGATAATGGCGTTTGT	23	3	TTTAGTGTGATAATGGCGTTTG	22	12				TTTAGTGTGATAATGGCGTTTG	22	5							TTTAGTGTGATAATGGCGTTTG	22	4
34	mir-3553	cggatctgtctctgctctgtTTATGGCCCTTCGGTAATTCACTgaccgagactgttcacagtgaattctaccagtgccatacacagaacaggagtc	96	rno-mir-3553,	18	-	20030641	20030736	miR-3553-5p	TTATGGCCCTTCGGTAATTCACT	23	TTATGGCCCTTCGGTAATTCACT	23	3	TTATGGCCCTTCGGTAATTCACT	23	5				TTATGGCCCTTCGGTAATTCACTG	24	3
35	mir-96	accacctgctgggccgatTTTGGCACTAGCACATTTTTGcttgtgtctctccgctctgagcaattatgtgcagtgccaatatgggaaagcaggatgctgc	100	bta-mir-96,eca-mir-96,cfa-mir-96,sla-mir-96,mmu-mir-96,rno-mir-96,	18	+	20030880	20030979	miR-96-5p	TTTGGCACTAGCACATTTTTGCT	23	TTTGGCACTAGCACATTTTTG	21	3	TTTGGCACTAGCACATTTTTGCT	23	8	TTTGGCACTAGCACATTTTTGCT	23	15	TTTGGCACTAGCACATTTTTGA	22	3	TTTGGCACTAGCACATTTTTGA	22	3	TTTGGCACTAGCACATTTTTGC	22	3	TTTGGCACTAGCACATTTTTG	21	3
36	mir-487a	TTAGCCTTTGGTACTTGAAGagtggctagccctgctgtgttcgctgtatctgtgacgAATCATACAGGGACATCCAGTttttcagtaccaaatactgct	99	bta-mir-487a,oar-mir-487a,hsa-mir-487a,ptr-mir-487a,mml-mir-487a,	scaffold	-	20431	20529	miR-487a-3p	AATCATACAGGGACATCCAGTT	22	AATCATACAGGGACATCCAGTT	22	35	AATCATACAGGGACATCCAGTT	22	12	AATCATACAGGGACATCCAGT	21	5
37	mir-411c	tggtccatgataggggagtggatGGTTGATCAGAGAACATACATTttctcaatgaTGTATGTCAACTGATCCACAGTccctacctatccagt	92	bta-mir-411c,oar-mir-3959,	scaffold	-	20894	20985	miR-411c-3p	TGTATGTCAACTGATCCACAGT	22	TGTATGTCAACTGATCCACAGT	22	1239	TGTATGTCAACTGATCCACAGT	22	350	TGTATGTCAACTGATCCACAGT	22	777	TGTATGTCAACTGATCCACAGT	22	24	TGTATGTCAACTGATCCACAGT	22	8	TGTATGTCAACTGATCCACAGT	22	12
38	mir-411c	tggtccatgataggggagtggatGGTTGATCAGAGAACATACATTttctcaatgatgtatgtcaactgatccacagtccctacctatccagt	92	bta-mir-411c,oar-mir-3959,	scaffold	-	20894	20985	miR-411c-5p	GGTTGATCAGAGAACATACATT	22	GGTTGATCAGAGAACATACATT	22	257	GGTTGATCAGAGAACATACATT	22	417	GGTTGATCAGAGAACATACATT	22	414	GGTTGATCAGAGAACATACATT	22	4026	GGTTGATCAGAGAACATACATT	22	3875	GGTTGATCAGAGAACATACATT	22	3831	GGTTGATCAGAGAACATACATT	22	3764	GGTTGATCAGAGAACATACATT	22	1930	GGTTGATCAGAGAACATACATT	22	2489
39	mir-592	tattatgccatgacaTTGTGTCAATATGCGATGATGTgtgtgatggcacagcgtcatcacgtggtgacgcaacatcatgacgtaagacgtcacagcgccaattaa	105	bta-mir-592,eca-mir-592,cfa-mir-592,hsa-mir-592,ggo-mir-592,ptr-mir-592,mmu-mir-592,rno-mir-592,	18	-	22280524	22280628	miR-592-5p	TTGTGTCAATATGCGATGATGT	22	TTGTGTCAATATGCGATGATGT	22	5																						TTGTGTCAATATGCGATGATGT	22	3
40	mir-1983	gaaagcatGCTCCAGTGGCGCAATCGgttagcgcgcggtacttatacagcagtatatgtgcgggTGATGCCGAGGTTGTGAGTTCGAGCCTcacctggagcatgttttcttcccttt	117	mmu-mir-1983,	7	+	23030083	23030199	miR-1983-3p	TAATGCCGAGGTTGTGAGTTCGAGCCT	27	CTCACCTGGAGCATGTTTTCT	21	81	CTCACCTGGAGCATGTTTTCT	21	134	CTCACCTGGAGCATGTTTTCA	21	183	CTCACCTGGAGCATGTTTTCA	21	21	CTCACCTGGAGCATGTTTTCA	21	19	TAATGCCGAGGTTGTGAGTTCGAGCCT	27	8	TAATGCCGAGGTTGTGAGTTCGAGCCT	27	7				TAATGCCGAGGTTGTGAGTTC	21	5
41	mir-1983	gaaagcatGCTCCAGTGGCGCAATCGgttagcgcgcggtacttatacagcagtatatgtgcgggTGATGCCGAGGTTGTGAGTTCGAGCCTcacctggagcatgttttcttcccttt	117	mmu-mir-1983,	7	+	23030083	23030199	miR-1983-5p	AAAAGCATGCTCCAGTGGCGC	21	AAAAGCATGCTCCAGTGGCGC	21	3				AAAAGCATGCTCCAGTGGCGC	21	8	AAAAGCATGCTCCAGTGGCGC	21	2	AAAAGCATGCTCCAGTGGCGC	21	4	AAAAGCATGCTCCAGTGGCGC	21	3
42	mir-655	tcagggatatttgaggAGAGGTTATCCGTGTTATGTTCgcttcattcatcatgaATAATACATGGTTAACCTCTTTttgaatatcaaactct	92	bta-mir-655,oar-mir-655,eca-mir-655,hsa-mir-655,ggo-mir-655,ptr-mir-655,ppy-mir-655,	scaffold	-	23056	23147	miR-655-3p	ATAATACATGGTTAACCTCTTT	22	ATAATACATGGTTAACCTCTTT	22	10054	ATAATACATGGTTAACCTCTTT	22	6929	ATAATACATGGTTAACCTCTTT	22	2506	ATAATACATGGTTAACCTCTTT	22	201	ATAATACATGGTTAACCTCTTT	22	170	ATAATACATGGTTAACCTCTTT	22	144	ATAATACATGGTTAACCTCTTT	22	59	ATAATACATGGTTAACCTCTTT	22	29	ATAATACATGGTTAACCTCTTT	22	81
43	mir-655	tcagggatatttgaggAGAGGTTATCCGTGTTATGTTCgcttcattcatcatgaATAATACATGGTTAACCTCTTTttgaatatcaaactct	92	bta-mir-655,oar-mir-655,eca-mir-655,hsa-mir-655,ggo-mir-655,ptr-mir-655,ppy-mir-655,	scaffold	-	23056	23147	miR-655-5p	AGAGGTTATCCGTGTTATGTTC	22	AGAGGTTATCCGTGTTATGTTC	22	19	AGAGGTTATCCGTGTTATGTTC	22	21	AGAGGTTATCCGTGTTATGTTC	22	1
44	mir-677	ctcactgatgagtagcttctgactttcgttcTTCTGAGTTTGCTGAAGCCagatgccattcctgag	66	bta-mir-677,	5	-	23664730	23664795	miR-677-3p	TTCTGAGTTTCCTGAAGCC	19																TGAGTTTCCTGAAGCCA	17	3
45	mir-449a	ctgtgtgtgatgggtTGGCAGTGTATTGTTAGCTGGTtgagtatatgagtagcatcagctaacatgcaactgctgtcttattgcatata	89	eca-mir-449a,ppy-mir-449a,	scaffold	-	238131	238219	miR-449a-5p	TGGCAGTGTATTGTTAGCTGGT	22	TGGCAGTGTATTGTTAGCTGGT	22	36	TGGCAGTGTATTGTTAGCTGGT	22	17	TGGCAGTGTATTGTTAGCTGGT	22	9	TGGCAGTGTATTGTTAGCTGGT	22	5	TGGCAGTGTATTGTTAGCTG	20	3
46	mir-544a	gattttcatcacctagggatcttgttaaaaggcagattctgattcagggaccaagATTCTGCATTTTTAGCAAGTTcccaagtgatgctagtgcttct	98	bta-mir-544a,oar-mir-544,eca-mir-544-2,cfa-mir-544,hsa-mir-544a,ptr-mir-544,	scaffold	-	24202	24299	miR-544a-3p	ATTCTGCATTTTTAGCAAGTTT	22	ATTCTGCATTTTTAGCAAGTTT	22	8	ATTCTGCATTTTTAGCAAGTTC	22	6
47	mir-544	gattttcatcacctagggaTCTTGTTAAAAGGCAGATTCTgattcagggaccaagattctgcatttttagcaagttcccaagtgatgctagtgcttct	98	bta-mir-544a,oar-mir-544,eca-mir-544-2,cfa-mir-544,	scaffold	-	24202	24299	miR-544-5p	TCTTGTTAAAAGGCAGATTCT	21	TCTTGTTAAAAGGCAGATTCT	21	2574	TCTTGTTAAAAGGCAGATTCT	21	1144	TCTTGTTAAAAGGCAGATTCT	21	528	TCTTGTTAAAAGGCAGATTCT	21	868	TCTTGTTAAAAGGCAGATTCT	21	525	TCTTGTTAAAAGGCAGATTCT	21	351	TCTTGTTAAAAGGCAGATTCT	21	211	TCTTGTTAAAAGGCAGATTCT	21	77	TCTTGTTAAAAGGCAGATTCT	21	236
48	mir-539	tcatacttgaggagaaattatccttggtgtgttcgctttatttgtgatgaATCATACAAGGACAATTTCTTTttgagtatcaaatcctgcctcggcgg	98	bta-mir-539,oar-mir-539,eca-mir-539,cfa-mir-539,hsa-mir-539,ptr-mir-539,	scaffold	-	25677	25774	miR-539-3p	ATCATACAAGGACAATTTCTTT	22	ATCATACAAGGACAATTTCTTT	22	246	ATCATACAAGGACAATTTCTTT	22	2293	ATCATACAAGGACAATTTCTT	21	1353	ATCATACAAGGACAATTTCTTT	22	454	ATCATACAAGGACAATTTCTTT	22	286	ATCATACAAGGACAATTTCTTT	22	260	ATCATACAAGGACAATTTCTTT	22	167	ATCATACAAGGACAATTTCTTT	22	57	ATCATACAAGGACAATTTCTTT	22	188
49	mir-539	tcatacttgaGGAGAAATTATCCTTGGTGTGTTcgctttatttgtgatgaATCATACAAGGACAATTTCTTtttgagtatcaaatcctgcctcggcgg	98	bta-mir-539,oar-mir-539,eca-mir-539,cfa-mir-539,hsa-mir-539,ptr-mir-539,mmu-mir-539,rno-mir-539,	scaffold	-	25677	25774	miR-539-5p	GGAGAAATTATCCTTGGTGTGT	22	GGAGAAATTATCCTTGGTGTGT	22	100	GGAGAAATTATCCTTGGTGTGT	22	129	GGAGAAATTATCCTTGGTGTGTT	23	6							GGAGAAATTATCCTTGGTGTGTT	23	3
50	mir-33a	GTGCATTGTAGTTGCATtgcatgttctggcagtacccgtgcagtgtttccacn	53	cfa-mir-33a,	scaffold	+	30048	30100	miR-33a-5p	GTGCATTGTAGTTGCATTGCA	21	GTGCATTGTAGTTGCATTGC	20	82	GTGCATTGTAGTTGCATTGCA	21	70	GTGCATTGTAGTTGCATTGCA	21	63	GTGCATTGTAGTTGCATTGC	20	10	GTGCATTGTAGTTGCATTGCA	21	10	GTGCATTGTAGTTGCATTGCA	21	5
51	mir-219	actcaggggcttcgccactgattgtccaaacgcaattcttgtacgagtctgcggccaaccgAGAATTGTGGCTGGACATCTGTggctgagctccggg	97	bta-mir-219,eca-mir-219-2,cfa-mir-219-2,ptr-mir-219-2,mmu-mir-219-2,rno-mir-219-2,mdo-mir-219,	1	-	302806847	302806943	miR-219-3p	AGAATTGTGGCTGGACATCTGT	22	AGAATTGTGGCTGGACATCTGT	22	13
52	mir-2964a	ccggagctcagccacagatgtccagccacaattctcggttggccgcagactcgtacaAGAATTGCGTTTGGACAATCAGTggcgaagcccctgagtt	97	hsa-mir-2964a,rno-mir-2964,	1	+	302806848	302806944	miR-2964a-3p	AGAATTGCGTTTGGACAATCAGT	23	AGAATTGCGTTTGGACAATCAGT	23	3
53	mir-376b	tctttctttggtatttaaaaggtggatattccttctatgtttacgtgattcatagataATCATAGAGGAAAATCCATGTTttcagtatcaaatgctgc	98	bta-mir-376b,bta-mir-376e,oar-mir-376b,eca-mir-376b,cfa-mir-376b,hsa-mir-376b,ggo-mir-376b,ptr-mir-376b,ppy-mir-376b,mmu-mir-376b,rno-mir-376b,	scaffold	-	31297	31394	miR-376b-3p	ATCATAGAGGAAAATCCATGT	21	ATCATAGAGGAAAATCCATGT	21	1046	ATCATAGAGGAAAATCCATGT	21	360	ATCATAGAGGAAAATCCATGTT	22	101	ATCATAGAGGAAAATCCATGT	21	118	ATCATAGAGGAAAATCCATG	20	49	ATCATAGAGGAAAATCCATGT	21	47	ATCATAGAGGAAAATCCATGT	21	19	ATCATAGAGGAAAATCCATGT	21	9	ATCATAGAGGAAAATCCATGT	21	19
54	mir-376d	ggtatttaaaaggTAGATTTTCCTTCTATGATTAcgtgttggatggttaATCATAGAGGAAAATCCACATtttcagtatcaa	82	bta-mir-376d,cfa-mir-376a-2,hsa-mir-376a-2,ptr-mir-376a-2,	scaffold	-	31674	31755	miR-376d-3p	ATCATAGAGGAAAATCCACAT	21	ATCATAGAGGAAAATCCACAT	21	1316	ATCATAGAGGAAAATCCACAT	21	987	ATCATAGAGGAAAATCCACAT	21	84	ATCATGGAGGAAAATCCACA	20	3	ATCATAGAGGAAAATCCACAT	21	3	ATCATAGAGGAAAATCCACAT	21	3
55	mir-376d	ggtatttaaaaggTAGATTTTCCTTCTATGATTAcgtgttggatggttaATCATAGAGGAAAATCCACATtttcagtatcaa	82	bta-mir-376d,cfa-mir-376a-2,hsa-mir-376a-2,ptr-mir-376a-2,	scaffold	-	31674	31755	miR-376d-5p	GTGGATTTTCCTTCTATGATT	21	GTGGATTTTCCTTCTATGATT	21	15	GTAGATTTTCCTTCTATGATT	21	13	TGGATTTTCCTTCTATGATTA	21	1
56	mir-1260b	tggctgctgctccccgtcgatCCCACCACCGCCACCAttattgctactgttcagcaggtgctgctggtggtgatggtgatagtctggcggcggcggtggggccgctg	107	hsa-mir-1260b,ggo-mir-1260b,ptr-mir-1260b,ppy-mir-1260b,mml-mir-1260b,	9	+	32404096	32404202	miR-1260b-5p	ATCCCACCACTGCCACCA	18	ATCCCACCACTGCCACCA	18	5	ATCCCACCACTGCCACCA	18	10	CCCACCACTGCCACCA	16	4	ATCCCACCACTGCCACCA	18	4				TCCCACCACTGCCACCA	17	3
57	mir-449b	gacctgaatcaggtAGGCAGTGTATTGTTAGCTGGCTgctttggatcagttcagcagccacgactaccctgccacttgcttctggataaattcttct	97	bta-mir-449b,hsa-mir-449b,ptr-mir-449b,ppy-mir-449b,mml-mir-449b,	16	-	36468230	36468326	miR-449b-5p	TGGCAGTGTATTGTTAGCTGGC	22	TGGCAGTGTATTGTTAGCTGGC						AGGCAGTGTATTGTTAGCTGGCT	23	3
58	mir-301a	tactgctaacaaatgctctgactttattgcactactgtactttacagctagCAGTGCAATAGTATTGTCAAAGCatctgagagcag	86	bta-mir-301a,eca-mir-301a,cfa-mir-301a,cgr-mir-301a,mmu-mir-301a,rno-mir-301a,	12	+	37079084	37079169	miR-301a-3p	CAGTGCAATAGTATTGTCAAAGC	23										CAGTGCAATAGTATTGTCAAAGC	23	419	CAGTGCAATAGTATTGTCAAAGC	23	242										CAGTGCAATAGTATTGTCAAAGC	23	56
59	mir-454	tgagtttcctaccgtgtaactaaaaagtttcctgtttatcaccagatcctagaaccctatcgatattgtctctgctgtgtaaatagctctgagTAGTGCAATATTGCTTATAGGGTTttggtgtttgggaagaactatgggca	143	bta-mir-454,eca-mir-454,cfa-mir-454,hsa-mir-454,ggo-mir-454,ptr-mir-454,ppy-mir-454,mml-mir-454,sha-mir-454,oan-mir-454,	12	+	37088039	37088181	miR-454-3p	TAGTGCAATATTGCTTATAGGGT	23	TAGTGCAATATTGCTTATAGGGT	23	219	TAGTGCAATATTGCTTATAGGGT	23	107	TAGTGCAATATTGCTTATAGGGT	23	47	TAGTGCAATATTGCTTATAGGGT	23	25	TAGTGCAATATTGCTTATAGGGTT	24	18	TAGTGCAATATTGCTTATAGGGT	23	12	TAGTGCAATATTGCTTATAGGGTT	24	4	TAGTGCAATATTGCTTATAGGGT	23	3	TAGTGCAATATTGCTTATAGGGT	23	11
60	mir-454	tgagtttcctaccgtgtaactaaaaagtttcctgtttatcaccagatcctagaACCCTATCGATATTGTCTCTgctgtgtaaatagctctgagTAGTGCAATATTGCTTATAGGGTtttggtgtttgggaagaactatgggca	143	bta-mir-454,eca-mir-454,cfa-mir-454,hsa-mir-454,ggo-mir-454,ptr-mir-454,ppy-mir-454,mml-mir-454,sha-mir-454,oan-mir-454,	12	+	37088039	37088181	miR-454-5p	ACCCTATCGATATTGTCTCTGCT	23	ACCCTATCGATATTGTCTCTGC	22	3
61	mir-4449	agcagccctcggcgtcccgggaggggcgggcggcggTGCCCGTCCCGGGGCCGCGCGAGGCACa	64	hsa-mir-4449,	8	+	41758461	41758524	miR-4449-3p	CGTCCCGGGGCCGCGCGAGGCAC	23							CGTCCCGGGGCCGCGCGAGGCAC	23	4	CGTCCCGGGGCCGCGCGAGGCAC	23	5	CGTCCCGGGGCCGCGCGAGGCACA	24	7	CGTCCCGGGGCCGCGCGAGGCAC	23	4							CGTCCCGGGGCCGCGCGAGGCAC	23	3
62	mir-876	tgaagtgctgTGGATTTCTTTGTGAATCACCatatctaagctaatgtggTGGTGGTTTACAAAGTAATTCatagtgcttca	81	bta-mir-876,eca-mir-876,ptr-mir-876,mmu-mir-876,	10	+	42052690	42052770	miR-876-3p	TGGTGGTTTACAAAGTAATTC	21	TGGTGGTTTACAAAGTAATTC	21	4
63	mir-876	tgaagtgctgTGGATTTCTTTGTGAATCACCatatctaagctaatgtggtggtggtttacaaagtaattcatagtgcttca	81	bta-mir-876,eca-mir-876,ptr-mir-876,	10	+	42052690	42052770	miR-876-5p	TGGATTTCTTTGTGAATCACC	21	TGGATTTCTTTGTGAATCACC	21	12
64	mir-1842	TGGCTCTGCGAGGTCGGCTCAaggtgggtctggatattgAGCAGGCCTGTCAGGGCGTTG	60	eca-mir-1842,cfa-mir-1842,	3	-	42401487	42401546	miR-1842-3p	AGCAGGCCTGTCAGGGCGTTG	21				AGCAGGCCTGTCAGGGCGTTG	21	3				AGCAGGCCTGTCAGGGCGTTG	21	12	AGCAGGCCTGTCAGGGCGTTG	21	11	AGCAGGCCTGTCAGGGCGTTG	21	7
65	mir-1842	TGGCTCTGCGAGGTCGGCTCAaggtgggtctggatattgAGCAGGCCTGTCAGGGCGTTG	60	eca-mir-1842,cfa-mir-1842,	3	-	42401487	42401546	miR-1842-5p	TGGCTCTGCGAGGTCGGCTCA	21	TGGCTCTGCGAGGTCGGCTC	20	15	TGGCTCTGCGAGGTCGGCTCA	21	49	TGGCTCTGCGAGGTCGGCTCAA	22	14	TGGCTCTGCGAGGTCGGCTCA	21	130	TGGCTCTGCGAGGTCGGCTCA	21	76	TGGCTCTGCGAGGTCGGCTCA	21	41	TGGCTCTGCGAGGTCGGCTCA	21	10	TGGCTCTGCGAGGTCGGCTCA	21	9	TGGCTCTGCGAGGTCGGCTCA	21	23
66	mir-188	ccctgctccctctctcaCATCCCTTGCATGGTGGAGGGTgagctttctgaaaacccCTCCCACGTGCAGGGTTTGCaggatggtgagcctcggcgtcctttgctctct	108	bta-mir-188,eca-mir-188,cfa-mir-188,hsa-mir-188,ggo-mir-188,ptr-mir-188,mml-mir-188,cgr-mir-188,mmu-mir-188,rno-mir-188,	X	+	48632378	48632485	miR-188-3p	CTCCCACGTGCAGGGTTTGCA	21	CTCCCACGTGCAGGGTTTGCA	21	40	CTCCCACGTGCAGGGTTTGCA	21	35	CTCCCACGTGCAGGGTTTGCA	21	55	CTCCCACGTGCAGGGTTTGCA	21	6	CTCCCACGTGCAGGGTTTGCA	21	8	CTCCCACGTGCAGGGTTTGCA	21	7
67	mir-188	ccctgctccctctctcaCATCCCTTGCATGGTGGAGGGtgagctttctgaaaacccctcccacgtgcagggtttgcaggatggtgagcctcggcgtcctttgctctct	108	bta-mir-188,eca-mir-188,cfa-mir-188,hsa-mir-188,ggo-mir-188,ptr-mir-188,mml-mir-188,cgr-mir-188,mmu-mir-188,rno-mir-188,	X	+	48632378	48632485	miR-188-5p	CATCCCTTGCATGGTGGAGGGT	22	CATCCCTTGCATGGTGGAGGGT	22	318	CATCCCTTGCATGGTGGAGGGT	22	152	CATCCCTTGCATGGTGGAGGGA	22	103	CATCCCTTGCATGGTGGAGGGT	22	16	CATCCCTTGCATGGTGGAGGGT	22	5	CATCCCTTGCATGGTGGAGGGT	22	13
68	mir-660	gaactgctccttctcccaTACCCATTGCATATCGGAGTTGtgaattctcaaagcacctcctatgtgcatggtttacaggagggcgagccctgtca	95	eca-mir-660,cfa-mir-660,hsa-mir-660,ggo-mir-660,ptr-mir-660,mml-mir-660,	X	+	48640809	48640903	miR-660-5p	TACCCATTGCATATCGGAGTTG	22	TACCCATTGCATATCGGAGTTG	22	7070	TACCCATTGCATATCGGAGTTG	22	3621	TACCCATTGCATATCGGAGTTG	22	799	TACCCATTGCATATCGGAGTTG	22	1687	TACCCATTGCATATCGGAGTTG	22	711	TACCCATTGCATATCGGAGTTG	22	898	TACCCATTGCATATCGGAGTTG	22	26	TACCCATTGCATATCGGAGTTG	22	18	TACCCATTGCATATCGGAGTTG	22	38
69	mir-301b	cctgctggccgcaggtgctctgacgaggttgcactactgtgctttgaggagCAGTGCAATGATATTGTCAAAGCatctgggaccagccttgggg	94	bta-mir-301b,eca-mir-301b,cfa-mir-301b,hsa-mir-301b,ptr-mir-301b,	14	-	53695887	53695980	miR-301b-3p	CAGTGCAATGATATTGTCAAAGC	23	CAGTGCAATGATATTGTCAAAGC	23	244	CAGTGCAATGATATTGTCAAAGC	23	47	CAGTGCAATGATATTGTCAAAGC	23	45	CAGTGCAATGATATTGTCAAAGC	23	88	CAGTGCAATGATATTGTCAAAGC	23	37	CAGTGCAATGATATTGTCAAAGC	23	45	CAGTGCAATGATATTGTCAAAGC	23	13	CAGTGCAATGATATTGTCAAAGC	23	4	CAGTGCAATGATATTGTCAAAGC	23	6
70	mir-26b	tgcccgggacccagTTCAAGTAATTCAGGATAGGTTgtgtgctgtccagCCTGTTCTCCATTACTTGGCTCggggg	76	bta-mir-26b,cfa-mir-26b,hsa-mir-26b,ptr-mir-26b,cgr-mir-26b,mmu-mir-26b,rno-mir-26b,	scaffold	+	56006	56081	miR-26b-3p	CCTGTTCTCCATTACTTGGCTC	22	CCTGTTCTCCATTACTTGGCTC	22	18	CCTGTTCTCCATTACTTGGCTC	22	60	CCTGTTCTCCATTACTTGGCTC	22	16	CCTGTTCTCCATTACTTGGCTC	22	40	CCTGTTCTCCATTACTTGGCTC	22	36	CCTGTTCTCCATTACTTGGCTC	22	30	CCTGTTCTCCATTACTTGGCTC	22	21	CCTGTTCTCCATTACTTGGCTC	22	4	CCTGTTCTCCATTACTTGGCTC	22	23
71	mir-26b	tgcccgggacccagTTCAAGTAATTCAGGATAGGTTgtgtgctgtccagCCTGTTCTCCATTACTTGGCTCggggg	76	bta-mir-26b,cfa-mir-26b,hsa-mir-26b,ptr-mir-26b,cgr-mir-26b,mmu-mir-26b,rno-mir-26b,	scaffold	+	56006	56081	miR-26b-5p	TTCAAGTAATTCAGGATAGGTT	22	TTCAAGTAATTCAGGATAGGTT	22	32656	TTCAAGTAATTCAGGATAGGTT	22	33619	TTCAAGTAATTCAGGATAGGTT	22	11071	TTCAAGTAATTCAGGATAGGTT	22	9838	TTCAAGTAATTCAGGATAGGTT	22	6674	TTCAAGTAATTCAGGATAGGTT	22	6351	TTCAAGTAATTCAGGATAGGTT	22	3858	TTCAAGTAATTCAGGATAGGTT	22	1531	TTCAAGTAATTCAGGATAGGTT	22	5605
72	mir-200b	cgccatcttactgggcagcattggatggtgtctggtctcTAATACTGCCTGGTAATGATGACGgcggggccctgc	75	eca-mir-200b,cfa-mir-200b,mmu-mir-200b,	6	+	58064307	58064381	miR-200b-3p	TAATACTGCCTGGTAATGATGAC	23	TAATACTGCCTGGTAATGATGAC	23	26				TAATACTGCCTGGTAATGATGA	22	3
73	mir-200b	cgcCATCTTACTGGGCAGCATTGGAtggtgtctggtctcTAATACTGCCTGGTAATGATGACggcggggccctgc	75	bta-mir-200b,eca-mir-200b,cfa-mir-200b,mmu-mir-200b,mdo-mir-200b,	6	+	58064307	58064381	miR-200b-5p	CATCTTACTGGGCAGCATTGGA	22	CATCTTACTGGGCAGCATTGGA	22	3
74	mir-223	cctgcaatgccacgctcCGTGTATTTGACAAGCTGAGTTggacactccatgtagtagagTGTCAGTTTGTCAAATACCccaagtgcggcatatgcctagcag	102	bta-mir-223,eca-mir-223,cfa-mir-223,hsa-mir-223,ppy-mir-223,mml-mir-223,sla-mir-223,mmu-mir-223,	X	+	58752416	58752517	miR-223-3p	TGTCAGTTTGTCAAATACCCCA	22	TGTCAGTTTGTCAAATACCCCA	22	13	TGTCAGTTTGTCAAATACCCC	21	25	TGTCAGTTTGTCAAATACCCC	21	14	TGTCAGTTTGTCAAATACC	19	45	TGTCAGTTTGTCAAATACC	19	79	TGTCAGTTTGTCAAATACC	19	20	TGTCAGTTTGTCAAATACC	19	24	TGTCAGTTTGTCAAATACCCCAT	23	5	TGTCAGTTTGTCAAATACCCCA	22	9
75	mir-141	gccggctctgggtccatcttccagcacagtgttggatggtctaatagtgaagctccTAACACTGTCTGGTAAAGATGgcccccggc	86	bta-mir-141,eca-mir-141,cfa-mir-141,hsa-mir-141,ggo-mir-141,ppa-mir-141,ptr-mir-141-2,ppy-mir-141,mml-mir-141,cgr-mir-141,mmu-mir-141,	5	-	66193711	66193796	miR-141-3p	TAACACTGTCTGGTAAAGATG	21	TAACACTGTCTGGTAAAGATG	21	14	TAACACTGTCTGGTAAAGATGG	22	17	TAACACTGTCTGGTAAAGATG	21	32	TAACACTGTCTGGTAAAGATG	21	24	TAACACTGTCTGGTAAAGATG	21	10	TAACACTGTCTGGTAAAGATG	21	14	TAACACTGTCTGGTAAAGATG	21	4	TAACACTGTCTGGTAAAGATG	21	3	TAACACTGTCTGGTAAAGATG	21	10
76	mir-200c	gggtgggggcccccgtcttacccagcagtgtttgggtgctgcttgcgagtctcTAATACTGCCGGGTAATGATGGaggcccctg	84	bta-mir-200c,eca-mir-200c,cfa-mir-200c,hsa-mir-200c,ggo-mir-200c,cgr-mir-200c,mmu-mir-200c,mdo-mir-200c,	5	-	66194124	66194207	miR-200c-3p	TAATACTGCCGGGTAATGATGG	22	TAATACTGCCGGGTAATGATGG	22	13
77	mir-412	ctggggtacaggacggaTGGTCGACCAGTTGGAAAGTAATtgtttcgaatGTACTTCACCTGGTCCACTAGCcgtcggtacccactgcag	90	bta-mir-412,eca-mir-412,hsa-mir-412,ptr-mir-412,cgr-mir-412,mmu-mir-412,rno-mir-412,	scaffold	-	6715	6804	miR-412-3p	CTTCACCTGGTCCACTAGCCGT	22	TACTTCACCTGGTCCACTAGC	21	54	CTTCACCTGGTCCACTAGCCGT	22	10	GTACTTCACCTGGTCCACTAGC	22	3
78	mir-412	ctggggtacaggacggaTGGTCGACCAGTTGGAAAGTAATtgtttcgaatGTACTTCACCTGGTCCACTAGCcgtcggtacccactgcag	90	bta-mir-412,eca-mir-412,hsa-mir-412,ptr-mir-412,cgr-mir-412,mmu-mir-412,rno-mir-412,	scaffold	-	6715	6804	miR-412-5p	TGGTCGACCAGTTGGAAAGTAAT	23	TGGTCGACCAGTTGGAAAGTAAT	23	3321	TGGTCGACCAGTTGGAAAGTAAT	23	366	TGGTCGACCAGTTGGAAAGTAAT	23	56	TGGTCGACCAGTTGGAAAGTAAT	23	43	TGGTCGACCAGTTGGAAAGT	20	6	TGGTCGACCAGTTGGAAAGTAAT	23	11
79	mir-409	tacccgagcaactttgcatctggacgaCGAATGTTGCTCGGTGAACCCCTtttcggtatc	60	cfa-mir-409,cgr-mir-409,	scaffold	-	6877	6936	miR-409-3p	GAATGTTGCTCGGTGAACCCCT	22	GAATGTTGCTCGGTGAACCCCT	22	24197	GAATGTTGCTCGGTGAACCCCT	22	1810	GAATGTTGCTCGGTGAACCCCT	22	645	GAATGTTGCTCGGTGAACCCCT	22	339	GAATGTTGCTCGGTGAACCCCT	22	147	GAATGTTGCTCGGTGAACCCCT	22	192
80	mir-409	tacCCGAGCAACTTTGCATctggacgacGAATGTTGCTCGGTGAACCCCTtttcggtatc	60	cfa-mir-409,cgr-mir-409,	scaffold	-	6877	6936	miR-409-5p	CCGAGCAACTTTGCAT	16	CCGAGCAACTTTGCAT	16	37	TACCCGAGCAACTTTGCAT	19	3	CCGAGCAACTTTGCAT	16	3
81	mir-384	tgttaaatcaggaatTGTAAACAATTCCTAGGTAATGTgtataatgtttgtaagtcATTCCTAGAAATTGTTCACAATgcctgtaaca	88	eca-mir-384,cfa-mir-384,cgr-mir-384,mmu-mir-384,rno-mir-384,	X	+	69515826	69515913	miR-384-3p	ATTCCTAGAAATTGTTCACAAT	22	ATTCCTAGAAATTGTTCACAAT	22	14	ATTCCTAGAAATTGTTCACAAT	22	18
82	mir-384	tgttaaatcaggaatTGTAAACAATTCCTAGGTAATGTgtataatgtttgtaagtcattcctagaaattgttcacaatgcctgtaaca	88	eca-mir-384,cfa-mir-384,cgr-mir-384,mmu-mir-384,rno-mir-384,	X	+	69515826	69515913	miR-384-5p	TGTAAACAATTCCTAGGTAATGT	23	TGTAAACAATTCCTAGGTAATGT	23	42	TGTAAACAATTCCTAGGTAATGT	23	17
83	mir-135b	gctctgctgtggccTATGGCTTTTCATTCCTATGTGATtactgttccaaactcatgtagggctaaaagccatgggctacagtgaggggcgtgctccttctcctgc	105	bta-mir-135b,eca-mir-135b,cfa-mir-135b,hsa-mir-135b,ggo-mir-135b,ptr-mir-135b,ppy-mir-135b,mmu-mir-135b,rno-mir-135b,mdo-mir-135b,	9	-	72339076	72339180	miR-135b-5p	TATGGCTTTTCATTCCTATGTG	22	TATGGCTTTTCATTCCTATGTG	22	6	TATGGCTTTTCATTCCTATGTG	22	2
84	mir-541	gggAAAGGATTCTGCTGTCGGTCCCACTccaaagttcccaaaatgggTGGTGGGCACAGAATCCGGCCTctgctt	75	bta-mir-541,eca-mir-541,hsa-mir-541,ppy-mir-541,mml-mir-541,	scaffold	-	8041	8115	miR-541-3p	TGGTGGGCACAGAATCCGGCCT	22	TGGTGGGCACAGAATCCGGCCT	22	402	TGGTGGGCACAGAATCCGGCCT	22	54	TGGTGGGCACAGAATCCGGCCT	22	64	TGGTGGGCACAGAATCCGGCCT	22	12	TGGTGGGCACAGAATCCGGCCT	22	7	TGGTGGGCACAGAATCCGGCCT	22	9
85	mir-541	gggAAAGGATTCTGCTGTCGGTCCCACTccaaagttcccaaaatgggTGGTGGGCACAGAATCCGGCCTctgctt	75	bta-mir-541,eca-mir-541,hsa-mir-541,ppy-mir-541,mml-mir-541,	scaffold	-	8041	8115	miR-541-5p	AAAGGATTCTGCTGTCGGTCCCACT	25	AAAGGATTCTGCTGTCGGTCCCACT	25	300	AAAGGATTCTGCTGTCGGTCCCACT	25	71	AAAGGATTCTGCTGTCGGTCCCACT	25	26	AAAGGATTCTGCTGTCGGTCCCACT	25	5	AAAGGATTCTGCTGTCGGTA	20	3
86	mir-208a	gctggccctgactcacttcctgtgacgggcGAGCTTTTGGCCCGGGTTATACctgatgctcacgtATAAGACGAGCAAAAAGCTTGTtggtcagaggagc	100	bta-mir-208a,eca-mir-208a,cfa-mir-208a,ptr-mir-208a,ppy-mir-208a,mmu-mir-208a,rno-mir-208a,oan-mir-208,	7	-	81043844	81043943	miR-208a-3p	ATAAGACGAGCAAAAAGCTTGT	22				ATAAGACGAGCAAAAAGCTTGT	22	97	ATAAGACGAGCAAAAAGCTTGT	22	27
87	mir-208a	gctggccctgactcacttcctgtgacgggcGAGCTTTTGGCCCGGGTTATACctgatgctcacgtATAAGACGAGCAAAAAGCTTGTtggtcagaggagc	100	bta-mir-208a,eca-mir-208a,cfa-mir-208a,ptr-mir-208a,ppy-mir-208a,mmu-mir-208a,rno-mir-208a,oan-mir-208,	7	-	81043844	81043943	miR-208a-5p	GAGCTTTTGGCCCGGGTTATAC	22				GAGCTTTTGGCCCGGGTTATAC	22	8
88	mir-1291	TGGCCCTGACTGAAGACCTGCAGTTAtatactacagctgttggtttcaagcaGAGGCCCAGAGGACTGTCTTCctg	76	bta-mir-1291,	5	+	82778924	82778999	miR-1291-5p	TGGCCCTGACTGAAGACCTGCA	22										TGGCCCTGACTGAAGACCTGC	21	3	TGGCCCTGACTGAAGACCTGC	21	3	TGGCCCTGACTGAAGACCTGCA	22	4
89	mir-2887-2	cgtcgggaccggggTCCGGTGCGGAGAGCCCTTCGTCCTGggaaacggggcgcggcc	57	bta-mir-2887-2,	6	-	866649	866705	miR-2887-2-3p	TGCGGAGAGCCCTTCGTCC	19				TGCGGAGAGCCCTTCGTCC	19	5	TGCGGAGAGCCCTTCGTCC	19	3	GAAACGGGGCGCGGCC	16	5	GAGAGCCCTTCGTCCTG	17	12	GAGAGCCCTTCGTCCTG	17	12							GAGAGCCCTTCGTCCTG	17	10
90	mir-2887-2	cgtcgggaccggggTCCGGTGCGGAGAGCCCTTCGTCCTGggaaacggggcgcggcc	57	bta-mir-2887-2,	6	-	866649	866705	miR-2887-2-5p	GGGACCGGGGTCCGGTGCGGA	21	GGGACCGGGGTCCGGTGCGGA	21	56	GGGACCGGGGTCCGGTGCGGA	21	184	GGGACCGGGGTCCGGTGCGGAGAGCCC	27	25	TCCGGTGCGGAGAGCCC	17	32	CCGGTGCGGAGAGCCC	16	39	TCCGGTGCGGAGAGCCC	17	61	TCCGGTGCGGAGAGCCC	17	7	TCCGGTGCGGAGAGCCC	17	10	TCCGGTGCGGAGAGCCC	17	22
91	mir-2904-3	acggcagcgccgcgggAGCCTCGGTTGGCCTCGGATAGCCGGTCCCCCGCCgtccccgccggcgggccg	69	bta-mir-2904-3,	6	-	866740	866808	miR-2904-3-3p	CTCGGATAGCCGGTCCCCCGC	21	CTCGGATAGCCGGTCCCCCGC	21	13	CTCGGATAGCCGGTCCCCCGC	21	36	CTCGGATAGCCGGTCCCCCGC	21	34	CTCGGATAGCCGGTCCCCCGCC	22	31	CTCGGATAGCCGGTCCCCCGCC	22	17	CTCGGATAGCCGGTCCCCCGCC	22	29	GTTGGCCTCGGATAGCCGGTCCCCCGCC	28	5	CTCGGATAGCCGGTCCCCCGCC	22	7	GTTGGCCTCGGATAGCCGGTCCCCCGCC	28	10
92	mir-2904-3	acggcagcgccgcgggAGCCTCGGTTGGCCTCGGATAGCCGGTCCCCCGCCgtccccgccggcgggccg	69	bta-mir-2904-3,	6	-	866740	866808	miR-2904-3-5p	CTCGGTTGGCCTCGGATAGCC	21	AGCCTCGGTTGGCCTCGGA	19	13	AGCGCCGCGGGAGCCTCGGT	20	17	GGCAGCGCCGCGGGAGCCTCGGT	23	19	CTCGGTTGGCCTCGGATAGCC	21	28	CTCGGTTGGCCTCGGATAGCC	21	18	CTCGGTTGGCCTCGGA	16	41	AGCCTCGGTTGGCCTCGGATAGCCGGTC	28	2	CTCGGTTGGCCTCGGATAGCCGGTCCCCC	29	4	CTCGGTTGGCCTCGGATAGCC	21	12
93	mir-6087	ggtgaggcgggggggcgagcccCGAGGGGCTCTCGCTTCTGGCGCCaag	49	hsa-mir-6087,	6	-	867408	867456	miR-6087-3p	CCGAGGGGCTCTCGCTTCTGGCGCC	25	CCCCGAGGGGCTCTCGC	17	27	CCCCGAGGGGCTCTCGCTTCTGGC	24	13	CCCCGAGGGGCTCTCGCTTCT	21	13	CCGAGGGGCTCTCGCTTCTGGCGCC	25	26	CCGAGGGGCTCTCGCTTCTGGCGCC	25	54	CCGAGGGGCTCTCGCTTCTGGCGCC	25	49	CGAGGGGCTCTCGCTTCTGGCGCC	24	7	CGAGGGGCTCTCGCTTCTGGCGCC	24	15	CGAGGGGCTCTCGCTTCTGGCGCC	24	27
94	mir-6087	ggtgaggcgggGGGGCGAGCCCCGAGGGGCTCTCGCTTCTGGCGCCaag	49	hsa-mir-6087,	6	-	867408	867456	miR-6087-5p	GGGGCGAGCCCCGAGGGGC	19				GGGGCGAGCCCCGAGGGGC	19	3	GGGCGAGCCCCGAGGGGCT	19	3
95	mir-716a	gctacgccgcgacGAGTAGGAGGGCCGCTGCGGTgagccttgaagcctagggcgtgggcccgggtggagccgccgcaggtgcagatcttggtggtagtagcaaatATTCAAACGAGAACTTTGAAGGCCgaagtggagaagggttccat	149	sha-mir-716a,	6	-	868791	868939	miR-716a-3p	ATTCAAACGAGAACTTTGAAGGCC	24	TCAAACGAGAACTTTGAAGGCC	22	18	ATTCAAACGAGAACTTTGAAGGCC	24	45	ATTCAAACGAGAACTTTGAAGGCC	24	37	ATTCAAACGAGAACTTTGAAGGCC	24	309	AAACGAGAACTTTGAAGGCC	20	425	AAACGAGAACTTTGAAGGC	19	455	ATTCAAACGAGAACTTTGAAGGCC	24	46	AAACGAGAACTTTGAAGGCC	20	78	ATTCAAACGAGAACTTTGAAGGCC	24	292
96	mir-716a	gctacgccgcgacGAGTAGGAGGGCCGCTGCGGTgagccttgaagcctagggcgtgggcccgggtggagccgccgcaggtgcagatcttggtggtagtagcaaatATTCAAACGAGAACTTTGAAGGCCgaagtggagaagggttccat	149	sha-mir-716a,	6	-	868791	868939	miR-716a-5p	CGACGAGTAGGAGGGC	16	CGACGAGTAGGAGGGC	16	9	CGACGAGTAGGAGGGC	16	8	CGACGAGTAGGAGGGC	16	5	CGACGAGTAGGAGGGC	16	13	CGACGAGTAGGAGGGC	16	11	CGACGAGTAGGAGGGC	16	14				CGACGAGTAGGAGGGC	16	4	CGACGAGTAGGAGGGC	16	3
97	mir-5105	cactccccggcgccgctcgtgGGGGGCCCAAGTCCTTCTGATCGAGGCCCagcccgtggacggtgtgaggccggtagcgg	80	mmu-mir-5105,	6	-	870882	870961	miR-5105-3p	CCTTCTGATCGAGGCCC	17	CCTTCTGATCGAGGCCC	17	51	CCTTCTGATCGAGGCCC	17	115	CCTTCTGATCGAGGCCC	17	37	CTTCTGATCGAGGCCC	16	743	CTTCTGATCGAGGCCC	16	425	CTTCTGATCGAGGCCC	16	759	CTTCTGATCGAGGCCC	16	104	CTTCTGATCGAGGCCC	16	172	CTTCTGATCGAGGCCC	16	333
98	mir-5105	cactccccggcgccgctcgtgGGGGGCCCAAGTCCTTCTGATCGAGGCCCagcccgtggacggtgtgaggccggtagcgg	80	mmu-mir-5105,	6	-	870882	870961	miR-5105-5p	CCAAGTCCTTCTGATCGAGGCCC	23	CAAGTCCTTCTGATCGAGGCCC	22	65	CAAGTCCTTCTGATCGAGGCCC	22	146	CCCCGGCGCCGCTCGTGG	18	133	CCAAGTCCTTCTGATCGAGGCCC	23	259	CCAAGTCCTTCTGATCGAGGCCC	23	144	CCAAGTCCTTCTGATCGAGGCCC	23	254	GGGGGCCCAAGTCCTTCTGATCGAGGCCC	29	37	CCAAGTCCTTCTGATCGAGGCCC	23	53	CCAAGTCCTTCTGATCGAGGCCC	23	140
99	mir-216b	gtggcagactggaAAATCTCTGCAGGCAAATGtgatgttactaaagaaatcacACACTTACCTGTAGAGATTCTAcagtctgacat	86	bta-mir-216b,eca-mir-216b,hsa-mir-216b,ptr-mir-216b,ppy-mir-216b,	3	+	90047313	90047398	miR-216b-5p	AAATCTCTGCAGGCAAATGTGA	22	AAATCTCTGCAGGCAAATGTGA	22	151	AAATCTCTGCAGGCAAATGTGA	22	19	AAATCTCTGCAGGCAAATGTGA	22	3
100	mir-1-2	agctaccaacttaatattacctactcagagtACATACTTCTTTATGTACCCATAtgaacatacaatgctatggAATGTAAAGAAGTATGTATTTTtggtaggcaataaacc	111	bta-mir-1-2,eca-mir-1-1,cfa-mir-1-2,ggo-mir-1,ptr-mir-1-2,mml-mir-1-2,mmu-mir-1a-2,rno-mir-1,mdo-mir-1,	6	+	99481915	99482025	miR-1-2-3p	GAATGTAAAGAAGTATGTATTTT	23				GAATGTAAAGAAGTATGTATTTT	23	7	GAATGTAAAGAAGTATGTATTTT	23	17	GAATGTAAAGAAGTATGTATTTT	23	3	TATGAACATACAATGCTATG	20	4										AATGTAAAGAAGTATGTATTTT	22	3
101	mir-1a-2	agctaccaacttaatattacctactcagagtACATACTTCTTTATGTACCCATAtgaacatacaatgctatggAATGTAAAGAAGTATGTATTTTtggtaggcaataaacc	111	bta-mir-1-2,eca-mir-1-1,cfa-mir-1-2,ggo-mir-1,ptr-mir-1-2,mml-mir-1-2,mmu-mir-1a-2,rno-mir-1,mdo-mir-1,	6	+	99481915	99482025	miR-1a-2-5p	ACATACTTCTTTATGTACCCAT	22	ACATACTTCTTTATGTACCCAT	22	5	ACATACTTCTTTATGTACCCAT	22	40	ACATACTTCTTTATGTACCCAT	22	6	ACATACTTCTTTATGTACCCAT	22	5	ACATACTTCTTTATGTACCCAT	22	4										ACATACTTCTTTATGTACCCAT	22	7
