# Supplementary material for: Deciphering the microRNA transcriptome of skeletal muscle during porcine development
Source: PeerJ. 2016 Jan 7;4:e1504. doi: 10.7717/peerj.1504 (PMC4715453; doi:10.7717/peerj.1504)
Supplement: Table S6 [file peerj-04-1504-s010.xlsx]

## Sheet: Sheet1
Table S6 The different expressionmiRNAs duringmuscle development stages
miRNA	p-value
miR-1983-5p	3e-06
miR-320-3p	0
miR-2483-3p	0
miR-451-5p	0
miR-541-5p	0
miR-148a-5p	0
miR-216b-5p	0
miR-338-5p	0
miR-362-3p	0
miR-376c-3p	0
miR-181c-5p	0
miR-181a-1-5p,miR-181a-2-5p	0
miR-181b-1-5p,miR-181b-2-5p	0
miR-181d-5p	0
miR-100-5p	0
miR-99a-5p	0
miR-193a-3p	0
miR-452-5p	0
miR-208b-5p	2e-06
miR-28-5p	0
miR-708-5p	0
miR-487a-3p	0
miR-154b-3p	0
miR-362-5p	0
miR-425-5p	0
miR-652-3p	0
miR-363-2-3p	0
miR-652-5p	0
miR-10b-3p	0
miR-214-3p	0
miR-125a-3p	0
miR-199a-1-3p,miR-199a-2-3p,miR-199b-3p	0
miR-1a-2-5p	0
miR-1-5p	0
miR-206-5p	0
miR-16-1-3p	0
miR-140-3p	0
miR-181a-2-3p	0
miR-665-3p	1.1e-05
miR-181c-3p	0
miR-181a-1-3p	0
miR-29c-5p	0
miR-132-5p	0
miR-221-5p	0
miR-212-5p	0
miR-1249-1-3p	0
miR-125b-1-3p	0
miR-136-5p	0
miR-130b-5p	0
miR-17-3p	0
miR-20a-3p	0
miR-324-3p	0
miR-378-1-3p,miR-378-2-3p	0
miR-432-3p	8e-06
miR-219-3p	0
miR-504-5p	0
miR-27b-5p	0.014078
miR-485-5p	0
let-7d-5p	0
miR-154b-5p	0
miR-655-5p	0
miR-377-5p	0
miR-383-5p	0
miR-107-3p	0
miR-103-1-3p,miR-103-2-3p	0
miR-381-5p	0
miR-222-3p	0
miR-221-3p	0
miR-339-1-3p	8e-06
miR-423-3p	0
miR-133a-1-5p,miR-133a-2-5p	0
miR-671-5p	0
miR-34c-1-5p	0
miR-27a-5p	0
miR-296-3p	0
miR-152-5p	0
miR-92a-1-5p	0
miR-491-5p	0
miR-19b-1-5p	0
miR-9-1-3p,miR-9-2-3p,miR-9-3-3p	0
miR-208b-3p	0
miR-208a-3p	0
miR-655-3p	0
miR-374b-5p	0
miR-135-1-3p	0
miR-545-3p	0
miR-421-3p	0
miR-377-3p	0
miR-23b-3p	0
miR-23a-3p	0
miR-539-3p	0
miR-376d-3p	0
miR-376a-3p	0
miR-376b-3p	0
miR-1260b-5p	0.000144
miR-215-5p	0.000199
miR-500-3p	0
miR-716a-3p	0
miR-384-3p	0
miR-145-3p	0
miR-544a-3p	4e-06
miR-450c-3p	0
miR-450a-3p	0
miR-186-5p	0
miR-330-3p	0
miR-20b-1-5p	0
miR-106a-5p,miR-17-5p	0
miR-10a-3p	0
miR-7-2-3p	0
miR-21-3p	0
miR-490-2-3p	0
miR-191-5p	0
miR-708-3p	0
miR-99a-3p	0
miR-99b-3p	0
miR-100-3p	0
miR-224-5p	0
miR-32-3p	0
miR-216-1-3p	0
miR-99b-5p	0
miR-574-3p	0
miR-28-3p	0
miR-497-5p	0
miR-15a-3p	0
miR-664-5p	0
miR-431-3p	0
miR-301-3p,miR-301a-3p	0
miR-301b-3p	0
miR-130b-3p	0
miR-130a-3p	0
miR-140-5p	0
miR-142-5p	0
miR-136-3p	0
miR-188-5p	0
miR-425-3p	0
miR-532-5p	0
miR-126-5p	0
miR-5105-5p	0
miR-1306-5p	0
miR-199a-1-5p,miR-199a-2-5p	0
miR-199b-5p	0
miR-361-3p	0
miR-331-3p	0
miR-2411-3p	0
miR-345-1-3p	0
miR-409-5p	0
miR-676-1-3p	0
miR-26a-3p	0
miR-532-3p	0
miR-326-3p,miR-326-3p	0
miR-6529-3p	0
miR-26b-3p	0
miR-5105-3p	0
miR-15b-3p	0
miR-2320-3p	0
miR-324-5p	0
miR-486-2-3p	0
miR-4332-3p	0
miR-24-1-5p	0
miR-151-3p	0
miR-98-3p	0
let-7a-2-3p	0
let-7f-2-3p	0
let-7f-1-3p	0
let-7d-3p	0
let-7e-3p	0
miR-190a-3p	0
miR-188-3p	0
miR-1468-5p	0
miR-378-1-5p	0
miR-1343-3p	0
miR-2904-3-3p	0
miR-1307-3p	0
miR-2904-3-5p	0.000947
miR-127-5p	0
miR-192-5p	0
miR-874-3p	0
let-7i-3p	0
miR-328-3p	0
miR-30c-2-3p	0
miR-30c-1-3p	0
miR-30b-3p	0
miR-769-3p	0
miR-1285-3p	0
let-7c-3p	2e-06
let-7g-3p	0
miR-210-3p	0
miR-744-3p	3e-06
miR-374b-3p	0
miR-374a-3p	0
miR-412-3p	0
miR-1271-5p	0
miR-30d-3p	0
miR-30e-3p	0
miR-30a-3p	0
miR-129a-5p,miR-129b-5p	5e-06
miR-499-3p	0
miR-148b-5p	0.000167
miR-1-2-3p	0
miR-409-3p	0
miR-6529-5p	0
miR-590-5p	0
miR-208a-5p	0
miR-455-3p	0
miR-186-3p	0
miR-551a-3p	7.3e-05
miR-301-5p	0
miR-130a-5p	0
miR-345-1-5p	0
miR-133b-5p	0
miR-1-3p	0
miR-206-3p	0
miR-539-5p	0
miR-144-5p	0
miR-2887-2-5p	0
miR-505-5p	0
miR-489-5p	0.000757
miR-143-5p	0
miR-411c-5p	0
miR-101-1-3p,miR-101-2-3p	0
miR-505-3p	0
miR-485-3p	0
miR-145-5p	0
miR-489-3p	0
miR-33a-5p	0
miR-24-2-5p	0
miR-376c-5p	0
miR-376a-5p	0
miR-376d-5p	0
miR-20a-5p	0
miR-141-3p	0
miR-132-3p	0
miR-582-3p	0
miR-124a-1-3p,miR-124a-2-3p	0
miR-18a-5p	0
miR-18b-5p	0
miR-200c-3p	0
miR-200b-3p	0
miR-500-5p	0
miR-216-1-5p	0
miR-365-1-3p,miR-365-2-3p	0
miR-1983-3p	0
miR-590-3p	0
miR-144-3p	0
miR-660-5p	0
miR-10b-5p	0
miR-10a-5p	0
miR-217-1-5p	0
miR-29a-3p	0
miR-29b-1-3p,miR-29b-2-3p	0
miR-29c-3p	0
miR-195-5p	0
miR-15a-5p	0
miR-15b-5p	0
miR-16-1-5p,miR-16-2-5p	0
miR-21-5p	0
miR-196a-1-5p	0
miR-196a-2-5p	0
miR-196b-1-5p	0
miR-454-3p	0
miR-381-3p	0
miR-183-5p	0
miR-135-1-5p,miR-135-2-5p	0
miR-455-5p	0
miR-664-3p	0.000961
miR-32-5p	0
miR-92b-3p	0
miR-92a-1-3p,miR-92a-2-3p	0
miR-450b-3p	0
miR-335-5p	0
miR-128-1-3p	0
miR-128-2-3p	0
miR-545-5p	0
miR-452-3p	0
miR-148a-3p	0
miR-148b-3p	0
miR-152-3p	0
miR-101-2-5p	0
miR-338-3p	0
miR-885-5p	0
miR-125b-1-5p	0
miR-125a-5p	0
miR-339-2-5p,miR-4334-3p	0
miR-339-1-5p	0
miR-615-3p	0
miR-421-5p	2e-06
miR-671-3p	3e-06
miR-2483-5p	0
miR-340-2-3p	0
miR-486-2-5p	0
miR-205-5p	0
miR-196b-1-3p	0
miR-1307-5p	0
miR-151-5p	0
miR-127-3p	0
miR-542-5p	0
miR-126-3p	0
miR-187-3p	1.5e-05
miR-139-5p	0
miR-331-5p	0
miR-150-2-5p	0
miR-330-5p	0
miR-149-5p	0
miR-432-5p	0
miR-544-5p	0
miR-9-1-5p,miR-9-2-5p,miR-9-3-5p	0
miR-493-3p	0
miR-146b-5p	0
miR-146a-5p	0
miR-769-5p	0
miR-143-3p	0
miR-423-5p	0
let-7e-5p	0
miR-98-5p	0
let-7f-1-5p,let-7f-2-5p	0
let-7a-1-5p,let-7a-2-5p	0
let-7c-5p	0
let-7g-5p	0
let-7i-5p	0
miR-496-3p	0
miR-574-5p	0
miR-190a-5p	0
miR-190b-5p	0
miR-507-3p	0
miR-219-5p	0
miR-214-5p	0
miR-744-5p	0
miR-7-1-5p,miR-7-2-5p	0
miR-184-3p	1e-06
miR-1306-3p	3e-06
miR-185-5p	0
miR-139-3p	0
miR-122-5p	0
miR-876-5p	0
miR-2320-5p	0
miR-449a-5p,miR-449a-5p	0
miR-4331-5p	0
miR-24-1-3p,miR-24-2-3p	0
miR-1842-5p	0
miR-193a-5p	0
miR-23b-5p	0
miR-412-5p	0
miR-541-3p	0
miR-384-5p	0
miR-30d-5p	0
miR-30b-5p	0
miR-30c-1-5p,miR-30c-2-5p	0
miR-30a-5p	0
miR-30e-5p	0
miR-194a-5p	0
miR-142-3p	0
miR-411c-3p	0
miR-431-5p	0
miR-542-3p	0
miR-19b-1-3p,miR-19b-2-3p	0
miR-19a-3p	0
miR-499-5p	0
miR-155-5p	0
miR-582-5p	0
miR-1296-5p	0
miR-340-2-5p	0
miR-374a-5p	0
miR-361-5p	0
miR-137-3p	0
miR-95-3p	0
miR-26a-5p	0
miR-26b-5p	0
miR-27a-3p	0
miR-27b-3p	0
miR-204-5p	0
miR-202-5p	0
miR-493-5p	0
miR-218-1-5p,miR-218b-5p	0
miR-3591-5p	0
miR-325-3p	1e-06
miR-182-5p	0
miR-96-5p	0
miR-133b-3p	0
miR-133a-1-3p,miR-133a-2-3p	0
miR-375-3p	8e-06
miR-450b-5p	0
miR-450a-5p	0
miR-450c-5p	0
miR-335-3p	0
PN-10664314-5p	1e-06
PN-10664348-5p	1e-06
PN-108993397-3p	0
PN-109259351-5p	0
PN-117383935-5p	0
PN-117395137-5p	0
PN-11744-3p	0
PN-1177-5p	0
PN-121669915-3p	0
PN-122371794-3p	0
PN-123962726-5p	1.6e-05
PN-124874040-3p	0
PN-124874040-5p	3.7e-05
PN-1311190-3p	0
PN-132092789-5p	4.4e-05
PN-133590719-5p	0
PN-133590720-5p	0
PN-133619219-5p	0
PN-13628633-5p	0
PN-13628636-5p	0
PN-136740114-3p	3.4e-05
PN-137160634-3p	0
PN-14862190-3p	1e-06
PN-14862190-5p	0
PN-14862192-5p	0
PN-151102625-3p	0
PN-151102625-5p	0
PN-151102661-3p	0.000568
PN-151102661-5p	0
PN-151102665-3p	0
PN-151102665-5p	0
PN-15340142-5p	1.3e-05
PN-1631-3p	0
PN-1631-5p	0
PN-1633-3p	0
PN-173927076-3p	0
PN-176858671-3p	0
PN-18750268-3p	0
PN-194131330-3p	0
PN-19684419-3p	0
PN-201635913-5p	2.1e-05
PN-22627710-3p	0
PN-22627710-5p	0
PN-22964522-3p	0
PN-24073-3p	0
PN-24076-3p	0
PN-24885174-5p	0
PN-24885175-5p	0
PN-260297070-5p	1.3e-05
PN-26036817-5p	0
PN-26036852-5p	0
PN-271202609-5p	1e-06
PN-2840923-5p	0
PN-30185188-3p	0
PN-32286946-5p	0
PN-3335108-5p	0
PN-33381395-5p	0
PN-35901728-3p	0
PN-35901731-3p	0
PN-36616-3p	0
PN-39469396-5p	0
PN-4010172-5p	0
PN-40675019-3p	0
PN-40675019-5p	0
PN-44808832-5p	0
PN-44808835-5p	0
PN-45711-3p	5.5e-05
PN-45712-3p	1e-06
PN-45714-3p	0
PN-48639689-3p	0
PN-4991957-3p	0
PN-52426315-5p	0.000679
PN-53138199-5p	0
PN-53295-5p	0
PN-5365914-5p	0
PN-5388442-3p	0
PN-5388442-5p	0
PN-54384830-5p	0
PN-57212584-3p	0
PN-57212584-5p	0
PN-64168-5p	0
PN-6421946-5p	4e-06
PN-645-3p	0
PN-645-5p	0
PN-65076824-3p	0
PN-66115778-3p	0
PN-675-3p	0
PN-679-3p	0
PN-69264044-3p	0
PN-69271470-3p	2e-06
PN-69920172-3p	0
PN-7444591-3p	0
PN-7464629-5p	0
PN-7563663-3p	0
PN-76693897-3p	0
PN-80161038-3p	0
PN-80161039-3p	0
PN-80161040-3p	0
PN-80865-5p	0
PN-80868-5p	0
PN-83591594-5p	0
PN-85376602-3p	0
PN-85376602-5p	0
PN-85376639-3p	0
PN-86489114-5p	0.000293
PN-868884-3p	0
PN-868884-5p	0
PN-870046-3p	0
PN-870046-5p	0
PN-8701319-5p	0
PN-87636905-5p	0
PN-87979788-3p	0
PN-88902872-5p	0
PN-88902875-5p	0
PN-94852325-3p	0
PN-94928232-3p	0
PN-94928232-5p	0
PN-9505866-5p	4.8e-05
PN-96223057-5p	0
PN-98296459-3p	0
PN-98296459-5p	0
